# Supplementary material for: Depletion ofDNMT3ASuppressed Cell Proliferation and RestoredPTENin Hepatocellular Carcinoma Cell
Source: Hindawi journal article supplement (doi:10.1155/2010/737535), 2010-01-01
Supplement: f2 [file 737535.f2.pdf]

**Supplementary****Table 1** DNMT3A siRNA sequences (19nt) for knocking down DNMT3A in HCC cell lines

| Constructs              | Sequences (5'—3')    |
|-------------------------|----------------------|
| pMT3A1                  | ACTGACGTCTCCAACATGA  |
| pMT3A2                  | CCAGATGTTCTTCGCTAAT  |
| pMT3A3                  | ATGACGAGCCAGAGTACGA  |
| sMT3A2 (scrambled seq.) | AGGTTCCCTCATTGCTACTA |

**Table 2**

| Gene functions         | Gene Symbol | Transcript ID | CpG island(CGI) |
|------------------------|-------------|---------------|-----------------|
| cell adhesion          | MCAM        | NM_006500     | CGI             |
|                        | L1CAM       | NM_000425     | NO              |
|                        | SSX2IP      | NM_014021     | CGI             |
| proteolysis            | ADAM20      | NM_003814     | NO              |
|                        | CRBN        | NM_016302     | CGI             |
|                        | ADAMTS6     | NM_197941     | NO              |
| mitochondrion          | DNM1L       | NM_005690     | CGI             |
|                        | DCTN6       | NM_006571     | CGI             |
|                        | MRPS14      | NM_022100     | NO              |
| apoptosis              | TAX1BP1     | NM_006024     | CGI             |
|                        | FXR1        | NM_001013438  | CGI             |
|                        | BNIP2       | NM_004330     | CGI             |
|                        | TNFAIP8     | NM_014350     | NO              |
| chromatin modification | HAT1        | NM_003642     | CGI             |
|                        | H2AFV       | NM_012412     | CGI             |
|                        | CHMP5       | NM_016410     | CGI             |
|                        | C11orf30    | NM_020193     | CGI             |
| translation            | BZW1        | NM_014670     | CGI             |
|                        | EIF4E       | NM_001968     | CGI             |
|                        | MTIF2       | NM_001005369  | CGI             |
|                        | EIF5B       | NM_015904     | CGI             |
| cytoskeleton           | CAPZA2      | NM_006136     | CGI             |
|                        | RDX         | NM_002906     | CGI             |
|                        | MAP7        | NM_003980     | CGI             |
|                        | MYO5A       | NM_000259     | CGI             |
|                        | SDCBP       | NM_001007067  | CGI             |
| mitosis                | KIF22       | NM_007317     | CGI             |
|                        | CCNG1       | NM_004060     | CGI             |
|                        | KNTC2       | NM_006101     | CGI             |
|                        | STAG2       | NM_006603     | CGI             |
|                        | PBK         | NM_018492     | CGI             |
| ubiquitin cycle        | RKHD2       | NM_016626     | CGI             |

---

|                                 |        |              |     |
|---------------------------------|--------|--------------|-----|
|                                 | APG12L | NM_004707    | CGI |
|                                 | UCHL5  | NM_015984    | CGI |
|                                 | APPBP1 | NM_001018159 | CGI |
|                                 | UBE1C  | NM_003968    | CGI |
|                                 | FBXO40 | NM_016298    | CGI |
| post-translational modification |        |              |     |
|                                 | DPM1   | NM_003859    | CGI |
|                                 | GOLGA5 | NM_005113    | CGI |
|                                 | PTPN12 | NM_002835    | CGI |
|                                 | MASK   | NM_016542    | CGI |
|                                 | PRPF4B | NM_003913    | NO  |
|                                 | IKBKB  | NM_001556    | CGI |
| signal transduction             |        |              |     |
|                                 | SH3BP5 | NM_001018009 | CGI |
|                                 | SCYE1  | NM_004757    | CGI |
|                                 | HBS1L  | NM_006620    | CGI |
|                                 | RAB11A | NM_004663    | NO  |
|                                 | RAP2C  | NM_021183    | CGI |
|                                 | STC1   | NM_003155    | CGI |
|                                 | TTRAP  | NM_016614    | NO  |
| signaling pathway               |        |              |     |
|                                 | LANCL1 | NM_006055    | NO  |
|                                 | AKAP12 | NM_005100    | CGI |
|                                 | F2RL2  | NM_004101    | NO  |
|                                 | CRHR1  | NM_004382    | CGI |
|                                 | GNAI3  | NM_006496    | CGI |
|                                 | ITGB1  | NM_002211    | CGI |
|                                 | HOMER3 | NM_004838    | CGI |
|                                 | PIG8   | NM_014679    | CGI |
| metabolism                      |        |              |     |
|                                 | FPGT   | NM_003838    | CGI |
|                                 | LYPLA1 | NM_006330    | CGI |
|                                 | DCK    | NM_000788    | CGI |
|                                 | PSMC6  | NM_002806    | NO  |
|                                 | HMGCS1 | NM_002130    | CGI |
|                                 | SC5DL  | NM_001024956 | CGI |
|                                 | SUCLA2 | NM_003850    | CGI |
|                                 | XYLB   | NM_005108    | CGI |
|                                 | ENPP4  | NM_014936    | CGI |
|                                 | MOXD1  | NM_015529    | CGI |
| cell cycle                      |        |              |     |
|                                 | CDC2   | NM_001786    | CGI |
|                                 | PTEN   | NM_000314    | CGI |
|                                 | TTK    | NM_003318    | CGI |

---

---

|                     |          |              |     |
|---------------------|----------|--------------|-----|
|                     | GNL3     | NM_014366    | CGI |
|                     | CUL2     | NM_003591    | CGI |
|                     | 10-Sep   | NM_144710    | CGI |
|                     | PTP4A1   | NM_003463    | CGI |
|                     | KLK10    | NM_002776    | CGI |
|                     | PPP1CB   | NM_002709    | CGI |
|                     | NIPBL    | NM_015384    | CGI |
|                     | CD164    | NM_006016    | CGI |
|                     | ADAMTS1  | NM_006988    | CGI |
|                     | TGFA     | NM_003236    | CGI |
| transcription       |          |              |     |
|                     | BCLAF1   | NM_014739    | CGI |
|                     | TCERG1   | NM_006706    | NO  |
|                     | COPS2    | NM_004236    | NO  |
|                     | PSIP1    | NM_021144    | CGI |
|                     | CDC5L    | NM_001253    | NO  |
|                     | LRRFIP1  | NM_004735    | CGI |
|                     | CBFB     | NM_001755    | CGI |
|                     | FUSIP1   | NM_006625    | NO  |
|                     | SCML1    | NM_006746    | CGI |
|                     | PC4      | NM_006713    | CGI |
|                     | TERF1    | NM_003218    | NO  |
|                     | TBL1XR1  | NM_024665    | CGI |
|                     | ZNF12    | NM_016265    | CGI |
|                     | BACH1    | NM_001011545 | NO  |
| molecular transport |          |              |     |
|                     | SLC25A24 | NM_013386    | CGI |
|                     | SLC38A2  | NM_018976    | CGI |
|                     | OSBPL3   | NM_015550    | CGI |
|                     | SNX2     | NM_003100    | CGI |
|                     | CLPX     | NM_006660    | CGI |
|                     | ETFDH    | NM_004453    | CGI |
|                     | ATP5L    | NM_006476    | NO  |
|                     | HSPCA    | NM_001017963 | CGI |
|                     | SEC23A   | NM_006364    | CGI |
|                     | SLC30A1  | NM_021194    | CGI |
|                     | ATP2B1   | NM_001001323 | NO  |
|                     | ARL10C   | NM_018184    | NO  |
|                     | RAP2C    | NM_021183    | CGI |
|                     | SEC24B   | NM_006323    | CGI |
|                     | ATP6V1C1 | NM_001007254 | CGI |
|                     | FABP4    | NM_001442    | CGI |
|                     | PREI3    | NM_015387    | CGI |
|                     | AP1S1    | NM_001283    | CGI |

---

---

|                 |          |              |     |
|-----------------|----------|--------------|-----|
|                 | CYP1A1   | NM_000499    | CGI |
|                 | ATP4A    | NM_000704    | NO  |
|                 | SCP2     | NM_001007098 | NO  |
|                 | SLC7A11  | NM_014331    | NO  |
|                 | FMO3     | NM_001002294 | NO  |
|                 | STAM2    | NM_005843    | CGI |
|                 | NDUFA5   | NM_005000    | NO  |
|                 | SEC63    | NM_007214    | CGI |
| Other functions |          |              |     |
|                 | DAF      | NM_000574    | CGI |
|                 | C4BPB    | NM_000716    | NO  |
|                 | ORC4L    | NM_002552    | CGI |
|                 | RAD51AP1 | NM_006479    | NO  |
|                 | ECT2     | NM_018098    | NO  |
|                 | ARPP-19  | NM_006628    | CGI |
|                 | IDI1     | NM_004508    | CGI |
|                 | EIF3S6   | NM_001568    | NO  |
|                 | CLEC2B   | NM_005127    | NO  |
|                 | MLF1     | NM_022443    | NO  |
|                 | HMMR     | NM_012484    | CGI |
|                 | SR140    | XM_031553    | NO  |
|                 | HSPA4    | NM_002154    | CGI |
|                 | CENTB2   | NM_012287    | CGI |
|                 | C15orf15 | NM_016304    | NO  |
|                 | PSG3     | NM_021016    | NO  |
|                 | TFPI     | NM_006287    | NO  |
|                 | BMP5     | NM_021073    | NO  |
|                 | DNAJB4   | NM_007034    | NO  |
|                 | FAM12A   | NM_006683    | NO  |
|                 | BBS7     | NM_018190    | NO  |
|                 | IFRD1    | NM_001007245 | CGI |
|                 | C1D      | NM_006333    | NO  |
|                 | TSNAX    | NM_005999    | CGI |
|                 | PDCD10   | NM_007217    | CGI |
|                 | STCH     | NM_006948    | CGI |
|                 | DDX50    | NM_024045    | CGI |
|                 | ZCCHC10  | NM_017665    | CGI |
|                 | ZNFN1A3  | NM_012481    | NO  |
|                 | C13orf10 | NM_022118    | CGI |
|                 | CMAH     | NR_002174    | NO  |
|                 | SH3BGRL  | NM_003022    | NO  |

---
